# Supplementary material for: Hierarchized band gap and enhanced optical responses of trivalent rare-earth metal nitrates due to (d–p)π conjugation interactions
Source: Royal Society of Chemistry journal article supplement (doi:10.1039/c6tc01512c), 2016-01-01
Supplement: c6tc01512c1.pdf [file c6tc01512c1.pdf]

## Supporting Information

### Hierarchized bandgap and enhanced optical responses from (d-p) $\pi$ conjugated interaction in trivalent $d^0$ transition metal nitrates

Bing-Hua Lei,<sup>a,b,‡</sup> Qingrong Kong,<sup>a,c,‡</sup> Zhihua Yang,<sup>a,\*</sup> Yun Yang,<sup>a</sup> Ying Wang,<sup>a</sup> Shilie  
Pan<sup>a,\*</sup>

<sup>a</sup>Key Laboratory of Functional Materials and Devices for Special Environments,  
Xinjiang Technical Institute of Physics & Chemistry, Chinese Academy of Sciences;  
Xinjiang Key Laboratory of Electronic Information Materials and Devices, 40-1  
South Beijing Road, Urumqi 830011, China.

<sup>b</sup>University of Chinese Academy of Sciences, Beijing 100049, China

<sup>c</sup>College of Chemistry and Chemical Engineering, Xinjiang Normal University,  
Urumqi 830054, China

\*To whom correspondence should be addressed.

E-mail: zhyang@ms.xjb.ac.cn (Zhihua Yang), slpan@ms.xjb.ac.cn (Shilie Pan);

‡ Equal Contributors

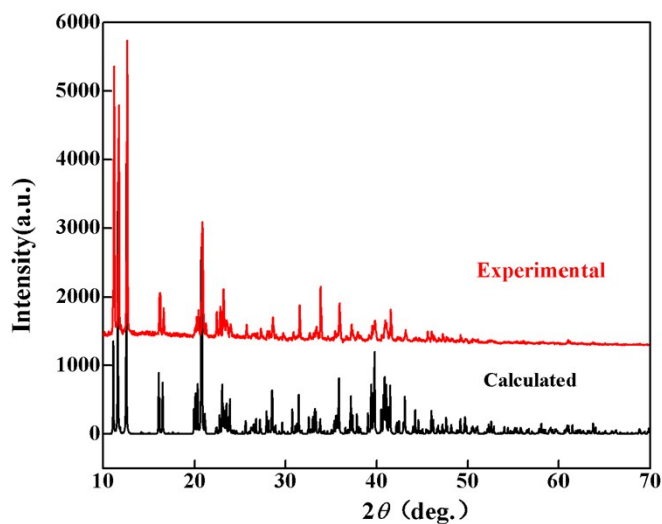

**Figure S1.** Experimental and calculated XRD patterns of NLN.

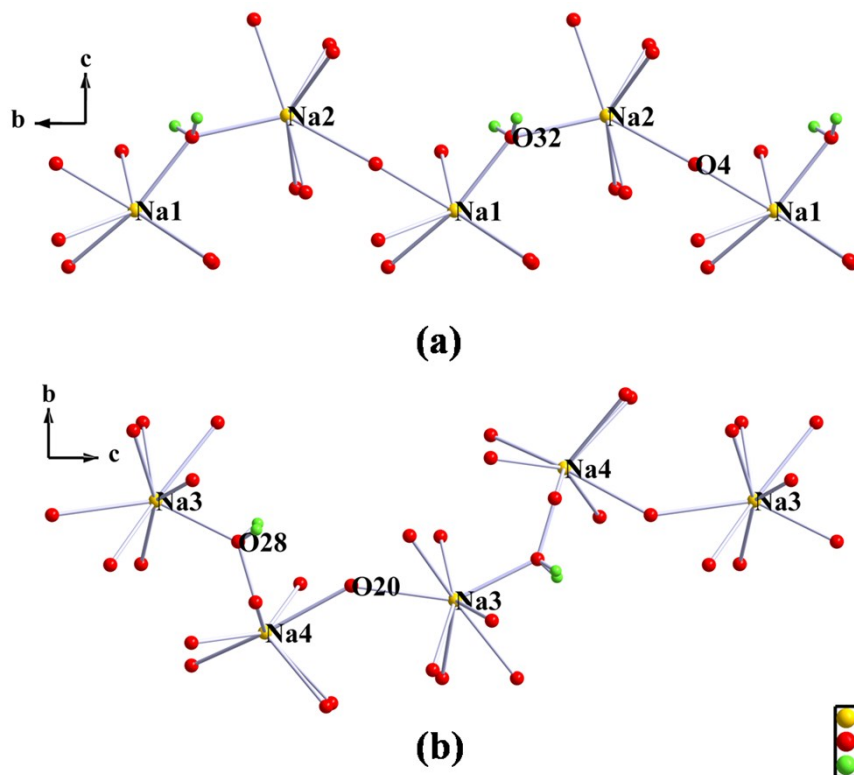

**Figure S2.** (a) The NaO<sub>7</sub> polyhedra connect further with each other via sharing two oxygen atoms alternatively forming 1D [NaO<sub>6</sub>]<sub>∞</sub> chain in NLN. (b) The NaO<sub>8</sub> octahedra connect further with each other via sharing two oxygen atoms alternatively forming 1D [NaO<sub>7</sub>]<sub>∞</sub> chain in NLN.

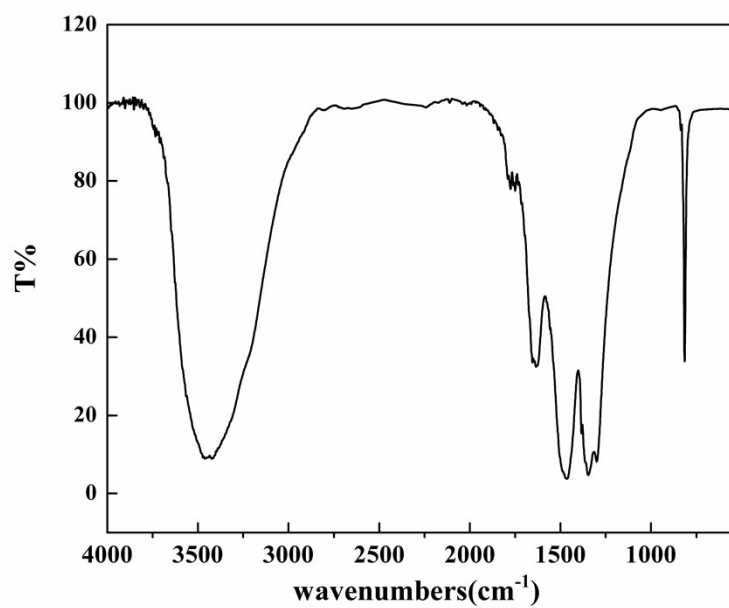

**Figure S3.** Infrared spectrum of NLN.

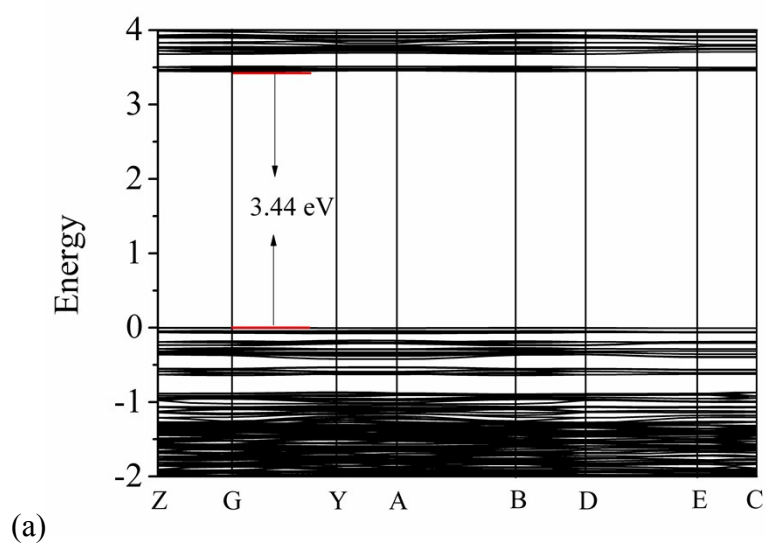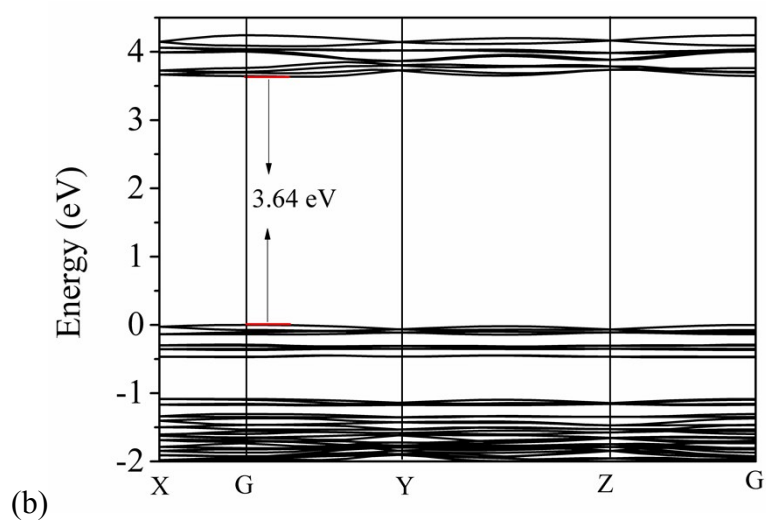

**Figure S4.** The bandgap of NLN(a) and KLN(b).

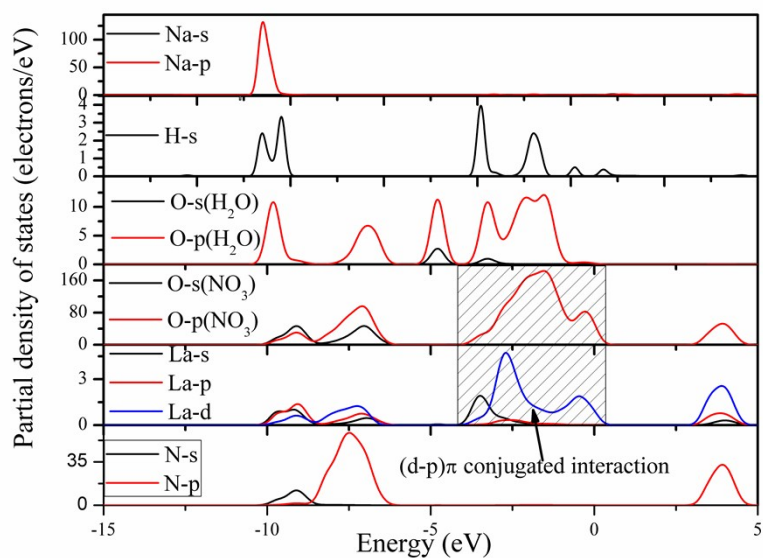

**Figure S5.** The PDOS of  $\text{Na}_4\text{La}_2(\text{NO}_3)_{10} \cdot 2\text{H}_2\text{O}$ .

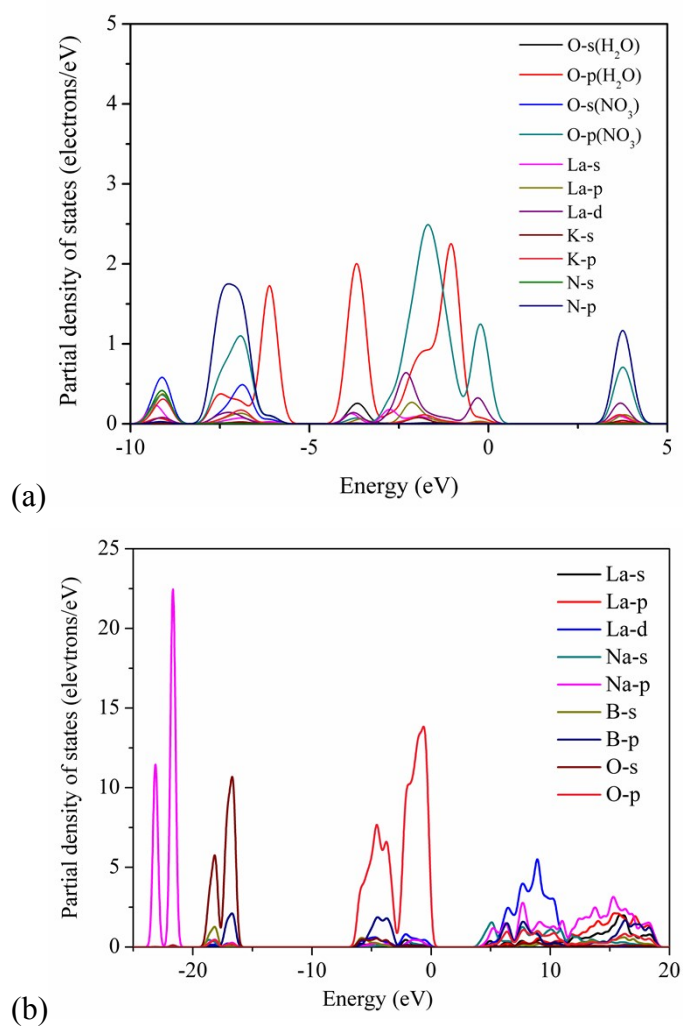

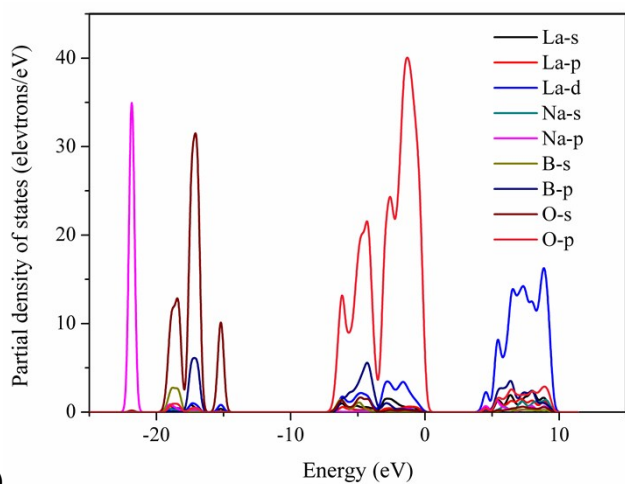

(c)

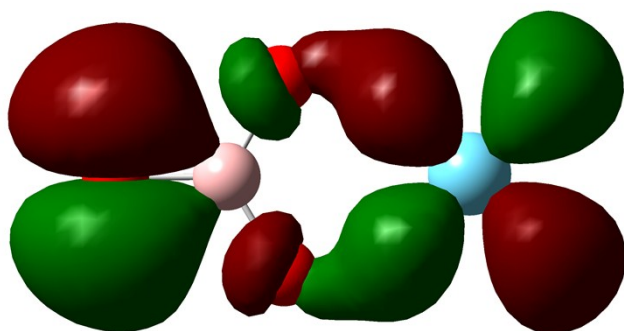

(d)

**Figure S6.** The PDOS of KLN (a),  $\text{La}_2\text{Na}_3\text{B}_3\text{O}_9$  (b),  $\text{La}_9\text{Na}_3\text{B}_8\text{O}_{27}$  (c) and the frontier orbital of  $\text{La-BO}_3$  in  $\text{La}_9\text{Na}_3\text{B}_8\text{O}_{27}$ .

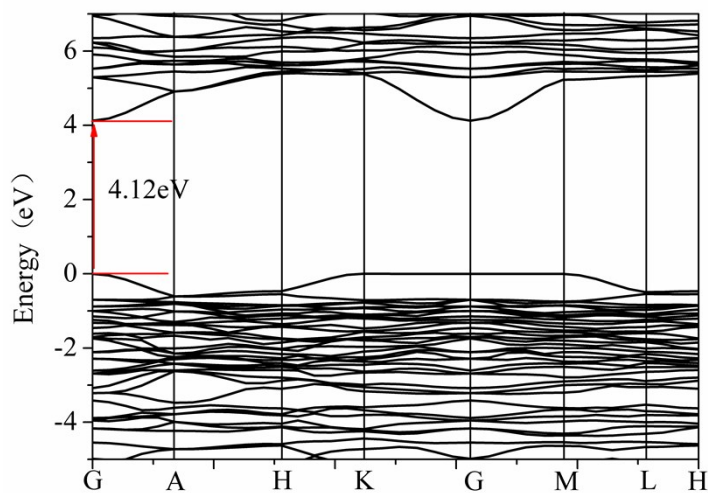

(a)

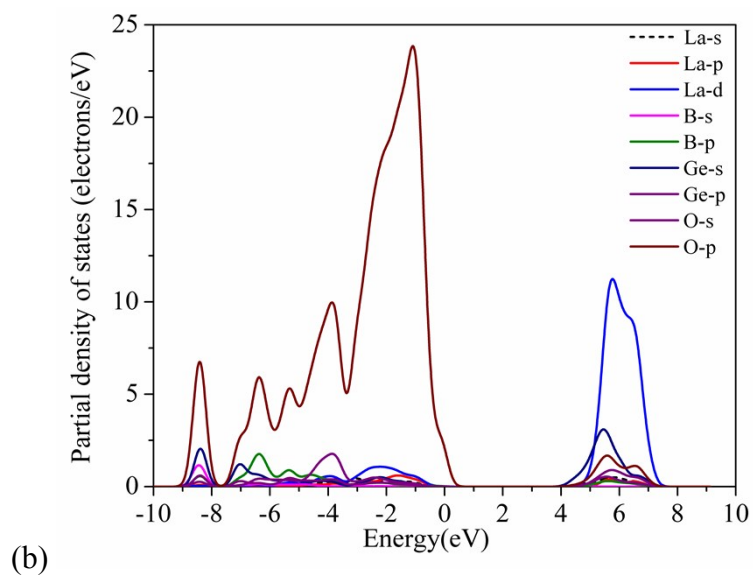

**Figure S7.** The band structure (a) and PDOS (b) of LaBGeO<sub>5</sub>

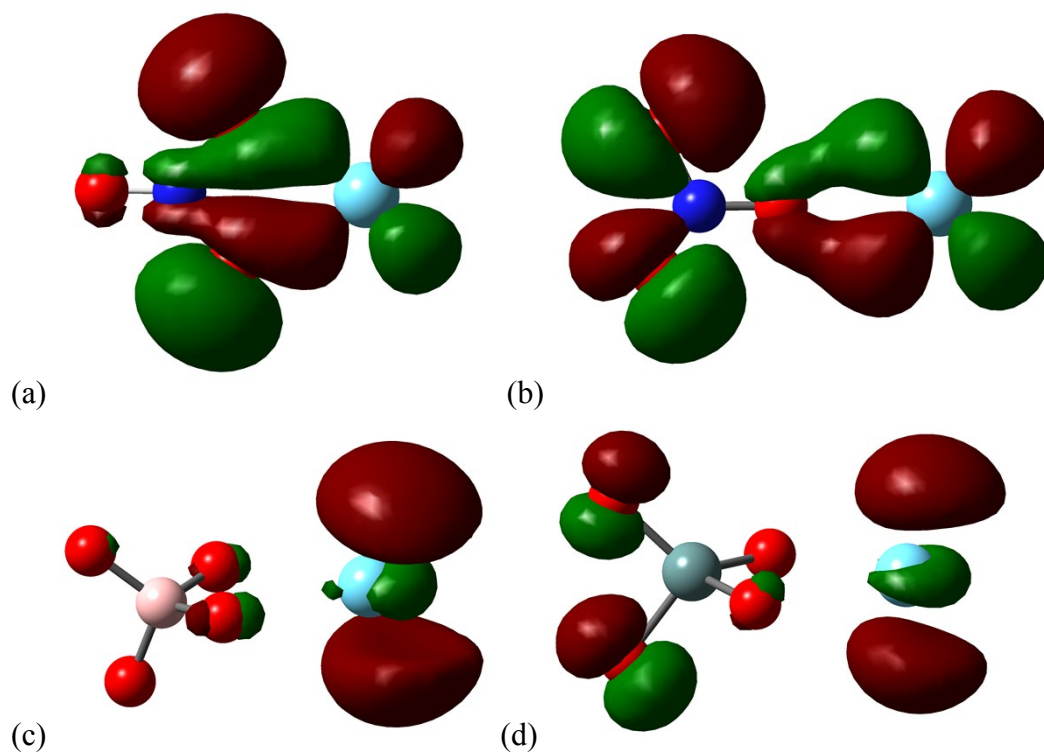

**Figure S8.** The frontier orbital of bidenticity (a) and monodenticity (b) structural of La-NO<sub>3</sub> in KLN and La-BO<sub>4</sub> (c), La-GeO<sub>4</sub> in LaBGeO<sub>5</sub>

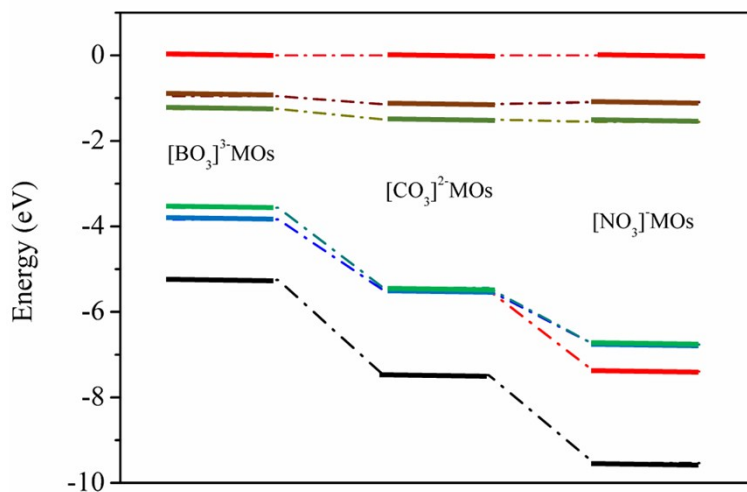

**Figure S9.** The molecule orbitals of  $\text{BO}_3$ ,  $\text{CO}_3$  and  $\text{NO}_3$ .

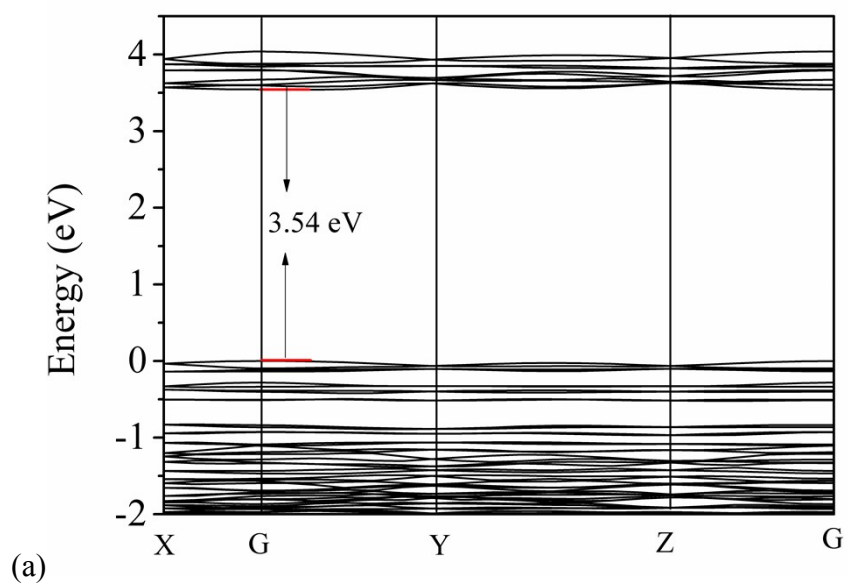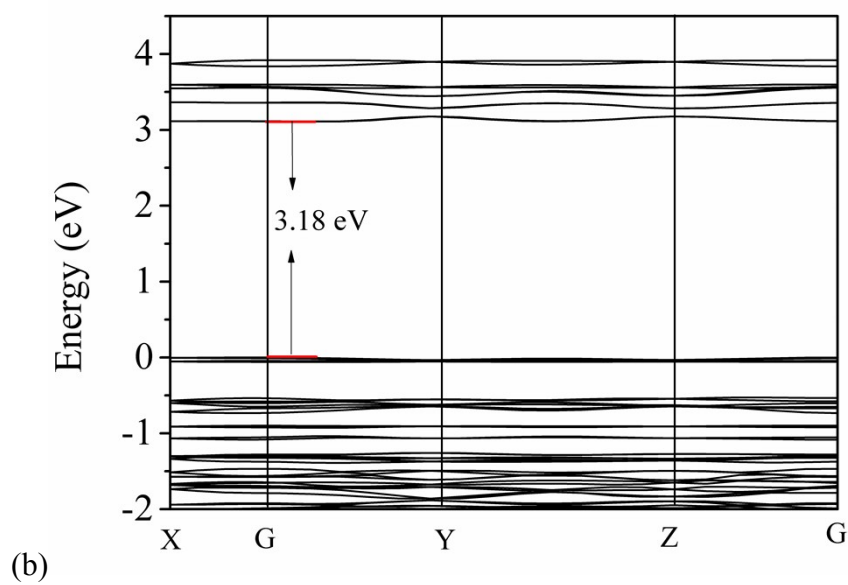

**Figure S10.** The bandgaps of KYN and KSN obtained by substitute lanthanum with yttrium or scandium in KLN.

**Table S1.** Selected bond lengths (Å) and angles [deg] for NLN.

|               |           |                |           |
|---------------|-----------|----------------|-----------|
| La(1)-O(9)    | 2.609(6)  | Na(1)-O(7)     | 2.412(7)  |
| La(1)-O(2)#2  | 2.639(6)  | Na(1)-O(4)     | 2.419(8)  |
| La(1)-O(7)    | 2.621(7)  | Na(1)-O(11)#5  | 2.488(8)  |
| La(1)-O(1)#3  | 2.688(7)  | Na(1)-O(12)#5  | 2.598(8)  |
| La(1)-O(11)   | 2.721(7)  | Na(1)-O(3)     | 2.683(8)  |
| La(1)-O(10)   | 2.693(6)  | Na(1)-O(5)     | 2.739(8)  |
| La(2)-O(19)   | 2.599(7)  | Na(1)-O(8)     | 2.885(8)  |
| La(2)-O(17)   | 2.610(7)  | Na(2)-O(32)#7  | 2.416(10) |
| La(2)-O(13)   | 2.571(7)  | Na(2)-O(9)#8   | 2.439(7)  |
| La(2)-O(6)    | 2.630(6)  | Na(2)-O(6)     | 2.447(7)  |
| La(2)-O(15)   | 2.638(6)  | Na(2)-O(4)     | 2.540(8)  |
| La(2)-O(18)   | 2.669(7)  | Na(2)-O(8)#8   | 2.561(8)  |
| La(2)-O(22)   | 2.687(6)  | Na(2)-O(31)    | 2.581(7)  |
| La(2)-O(5)    | 2.689(7)  | Na(2)-O(1)#2   | 2.637(7)  |
| La(2)-O(21)   | 2.745(6)  | Na(3)-O(28)    | 2.343(8)  |
| La(2)-O(10)   | 2.755(6)  | Na(3)-O(19)    | 2.446(7)  |
| La(2)-O(12)   | 2.774(7)  | Na(3)-O(26)    | 2.456(8)  |
| La(3)-O(25)   | 2.596(6)  | Na(3)-O(17)#7  | 2.512(7)  |
| La(3)-O(24)   | 2.641(6)  | Na(3)-O(29)    | 2.531(8)  |
| La(3)-O(29)#5 | 2.642(7)  | Na(3)-O(30)    | 2.590(8)  |
| La(3)-O(26)#4 | 2.673(7)  | Na(3)-O(20)    | 2.701(8)  |
| La(3)-O(22)   | 2.712(6)  | Na(3)-O(16)#7  | 2.833(8)  |
| La(3)-O(23)   | 2.730(6)  | Na(4)-O(28)    | 2.419(9)  |
| N(1)-O(3)     | 1.226(9)  | Na(4)-O(24)    | 2.501(7)  |
| N(1)-O(1)     | 1.259(9)  | Na(4)-O(15)    | 2.535(7)  |
| N(1)-O(2)     | 1.282(9)  | Na(4)-O(20)#9  | 2.595(8)  |
| N(2)-O(4)     | 1.225(9)  | Na(4)-O(23)#3  | 2.653(8)  |
| N(2)-O(6)     | 1.257(10) | Na(4)-O(21)#3  | 2.716(8)  |
| N(2)-O(5)     | 1.260(9)  | Na(4)-O(14)    | 2.805(8)  |
| N(3)-O(8)     | 1.219(9)  | Na(4)-O(27)#10 | 2.858(8)  |
| N(3)-O(9)     | 1.268(9)  | O(28)-H(1)     | 0.84(2)   |
| N(3)-O(7)     | 1.274(9)  | O(28)-H(2)     | 0.83(2)   |
| N(4)-O(12)    | 1.240(9)  | O(32)-H(4)     | 0.83(2)   |
| N(4)-O(10)    | 1.243(10) | O(32)-H(3)     | 0.84(2)   |
| N(4)-O(11)    | 1.264(9)  | O(31)-La(2)#8  | 2.630(6)  |
| N(5)-O(14)    | 1.213(9)  | N(8)-O(22)     | 1.284(8)  |
| N(5)-O(13)    | 1.264(9)  | N(8)-O(21)     | 1.227(8)  |



|                     |            |                       |            |
|---------------------|------------|-----------------------|------------|
| N(5)-O(15)          | 1.271(9)   | N(8)-O(23)            | 1.252(8)   |
| N(6)-O(16)          | 1.228(10)  | N(9)-O(30)#5          | 1.214(9)   |
| N(6)-O(17)          | 1.270(9)   | N(9)-O(29)#5          | 1.260(9)   |
| N(6)-O(31)#3        | 1.275(10)  | N(9)-O(24)            | 1.266(10)  |
| N(7)-O(19)          | 1.279(8)   | N(10)-O(27)           | 1.227(10)  |
| N(7)-O(20)          | 1.206(10)  | N(10)-O(25)           | 1.261(9)   |
| N(7)-O(18)          | 1.264(9)   | N(10)-O(26)           | 1.268(9)   |
| O(2)#2-La(1)-O(10)  | 103.72(19) | Na(2)#5-O(32)-H(4)    | 116(8)     |
| O(9)-La(1)-O(9)#1   | 103.9(3)   | O(2)#3-La(1)-O(10)    | 66.89(18)  |
| O(9)-La(1)-O(7)     | 48.92(18)  | O(1)#3-La(1)-O(10)    | 110.21(18) |
| O(9)#1-La(1)-O(7)   | 67.8(2)    | O(1)#2-La(1)-O(10)    | 69.09(18)  |
| O(9)-La(1)-O(7)#1   | 67.8(2)    | O(9)-La(1)-O(10)#1    | 128.07(18) |
| O(9)#1-La(1)-O(7)#1 | 48.92(18)  | O(9)#1-La(1)-O(10)#1  | 65.57(19)  |
| O(7)-La(1)-O(7)#1   | 65.9(3)    | O(7)-La(1)-O(10)#1    | 129.33(19) |
| O(9)-La(1)-O(2)#2   | 160.38(19) | O(7)#1-La(1)-O(10)#1  | 69.1(2)    |
| O(9)#1-La(1)-O(2)#2 | 68.9(2)    | O(2)#2-La(1)-O(10)#1  | 66.89(18)  |
| O(7)-La(1)-O(2)#2   | 112.68(19) | O(2)#3-La(1)-O(10)#1  | 103.72(19) |
| O(7)#1-La(1)-O(2)#2 | 113.97(19) | O(1)#3-La(1)-O(10)#1  | 69.09(18)  |
| O(9)-La(1)-O(2)#3   | 68.9(2)    | O(1)#2-La(1)-O(10)#1  | 110.22(18) |
| O(9)#1-La(1)-O(2)#3 | 160.39(19) | O(10)-La(1)-O(10)#1   | 161.0(3)   |
| O(7)-La(1)-O(2)#3   | 113.97(19) | O(9)-La(1)-O(11)#1    | 129.93(19) |
| O(7)#1-La(1)-O(2)#3 | 112.68(19) | O(9)#1-La(1)-O(11)#1  | 109.53(19) |
| O(2)#2-La(1)-O(2)#3 | 123.7(3)   | O(7)-La(1)-O(11)#1    | 175.31(19) |
| O(9)-La(1)-O(1)#3   | 69.9(2)    | O(7)#1-La(1)-O(11)#1  | 109.5(2)   |
| O(9)#1-La(1)-O(1)#3 | 112.7(2)   | O(2)#2-La(1)-O(11)#1  | 69.0(2)    |
| O(7)-La(1)-O(1)#3   | 113.69(19) | O(2)#3-La(1)-O(11)#1  | 67.1(2)    |
| O(7)#1-La(1)-O(1)#3 | 69.89(19)  | O(1)#3-La(1)-O(11)#1  | 63.32(19)  |
| O(2)#2-La(1)-O(1)#3 | 129.6(2)   | O(1)#2-La(1)-O(11)#1  | 113.2(2)   |
| O(2)#3-La(1)-O(1)#3 | 47.9(2)    | O(10)-La(1)-O(11)#1   | 115.1(2)   |
| O(9)-La(1)-O(1)#2   | 112.7(2)   | O(10)#1-La(1)-O(11)#1 | 46.75(19)  |
| O(9)#1-La(1)-O(1)#2 | 69.9(2)    | O(9)-La(1)-O(11)      | 109.53(19) |
| O(7)-La(1)-O(1)#2   | 69.89(19)  | O(9)#1-La(1)-O(11)    | 129.94(19) |
| O(7)#1-La(1)-O(1)#2 | 113.69(19) | O(7)-La(1)-O(11)      | 109.5(2)   |
| O(2)#2-La(1)-O(1)#2 | 47.9(2)    | O(7)#1-La(1)-O(11)    | 175.31(19) |
| O(2)#3-La(1)-O(1)#2 | 129.6(2)   | O(2)#2-La(1)-O(11)    | 67.1(2)    |
| O(1)#3-La(1)-O(1)#2 | 176.0(3)   | O(2)#3-La(1)-O(11)    | 69.0(2)    |
| O(9)-La(1)-O(10)    | 65.57(19)  | O(1)#3-La(1)-O(11)    | 113.2(2)   |
| O(9)#1-La(1)-O(10)  | 128.07(18) | O(1)#2-La(1)-O(11)    | 63.32(19)  |
| O(7)-La(1)-O(10)    | 69.1(2)    | O(10)-La(1)-O(11)     | 46.75(19)  |
| O(7)#1-La(1)-O(10)  | 129.33(19) | O(10)#1-La(1)-O(11)   | 115.1(2)   |
| O(31)#3-La(2)-O(6)  | 111.3(2)   | O(11)#1-La(1)-O(11)   | 75.2(3)    |
| O(13)-La(2)-O(15)   | 48.8(2)    | O(13)-La(2)-O(19)     | 69.1(2)    |
| O(19)-La(2)-O(15)   | 66.4(2)    | O(13)-La(2)-O(17)     | 103.6(2)   |

|                       |            |                       |            |
|-----------------------|------------|-----------------------|------------|
| O(17)-La(2)-O(15)     | 68.3(2)    | O(19)-La(2)-O(17)     | 123.0(2)   |
| O(31)#3-La(2)-O(15)   | 66.8(2)    | O(13)-La(2)-O(31)#3   | 67.6(2)    |
| O(6)-La(2)-O(15)      | 177.32(19) | O(19)-La(2)-O(31)#3   | 130.1(2)   |
| O(13)-La(2)-O(18)     | 110.4(2)   | O(17)-La(2)-O(31)#3   | 48.97(18)  |
| O(19)-La(2)-O(18)     | 48.04(19)  | O(13)-La(2)-O(6)      | 129.0(2)   |
| O(17)-La(2)-O(18)     | 132.1(2)   | O(19)-La(2)-O(6)      | 114.8(2)   |
| O(31)#3-La(2)-O(18)   | 178.0(2)   | O(17)-La(2)-O(6)      | 112.1(2)   |
| O(6)-La(2)-O(18)      | 70.1(2)    | O(15)-La(2)-O(10)     | 111.77(19) |
| O(15)-La(2)-O(18)     | 111.7(2)   | O(18)-La(2)-O(10)     | 107.97(19) |
| O(13)-La(2)-O(22)     | 117.21(18) | O(22)-La(2)-O(10)     | 173.64(18) |
| O(19)-La(2)-O(22)     | 66.6(2)    | O(5)-La(2)-O(10)      | 69.1(2)    |
| O(17)-La(2)-O(22)     | 68.73(19)  | O(21)-La(2)-O(10)     | 129.98(18) |
| O(31)#3-La(2)-O(22)   | 114.28(19) | O(13)-La(2)-O(12)     | 68.4(2)    |
| O(6)-La(2)-O(22)      | 109.26(18) | O(19)-La(2)-O(12)     | 70.2(2)    |
| O(15)-La(2)-O(22)     | 73.39(18)  | O(17)-La(2)-O(12)     | 162.22(18) |
| O(18)-La(2)-O(22)     | 66.08(19)  | O(31)#3-La(2)-O(12)   | 113.94(19) |
| O(13)-La(2)-O(5)      | 124.2(2)   | O(6)-La(2)-O(12)      | 66.54(19)  |
| O(19)-La(2)-O(5)      | 161.90(19) | O(15)-La(2)-O(12)     | 112.3(2)   |
| O(17)-La(2)-O(5)      | 68.7(2)    | O(18)-La(2)-O(12)     | 65.16(19)  |
| O(31)#3-La(2)-O(5)    | 67.9(2)    | O(22)-La(2)-O(12)     | 128.97(19) |
| O(6)-La(2)-O(5)       | 47.91(19)  | O(5)-La(2)-O(12)      | 101.9(2)   |
| O(15)-La(2)-O(5)      | 131.1(2)   | O(21)-La(2)-O(12)     | 124.75(19) |
| O(18)-La(2)-O(5)      | 114.0(2)   | O(10)-La(2)-O(12)     | 46.23(18)  |
| O(22)-La(2)-O(5)      | 110.70(19) | O(25)-La(3)-O(25)#4   | 105.5(3)   |
| O(13)-La(2)-O(21)     | 163.09(19) | O(25)-La(3)-O(24)     | 67.2(2)    |
| O(19)-La(2)-O(21)     | 103.7(2)   | O(25)#4-La(3)-O(24)   | 122.0(2)   |
| O(17)-La(2)-O(21)     | 66.71(19)  | O(25)-La(3)-O(24)#4   | 122.0(2)   |
| O(31)#3-La(2)-O(21)   | 110.4(2)   | O(25)#4-La(3)-O(24)#4 | 67.2(2)    |
| O(6)-La(2)-O(21)      | 67.8(2)    | O(24)-La(3)-O(24)#4   | 166.4(3)   |
| O(15)-La(2)-O(21)     | 114.4(2)   | O(25)-La(3)-O(29)#5   | 110.6(2)   |
| O(18)-La(2)-O(21)     | 71.3(2)    | O(25)#4-La(3)-O(29)#5 | 126.83(19) |
| O(22)-La(2)-O(21)     | 47.10(18)  | O(24)-La(3)-O(29)#5   | 48.12(19)  |
| O(5)-La(2)-O(21)      | 66.7(2)    | O(24)#4-La(3)-O(29)#5 | 118.8(2)   |
| O(13)-La(2)-O(10)     | 66.33(19)  | O(25)-La(3)-O(29)#6   | 126.83(19) |
| O(19)-La(2)-O(10)     | 111.5(2)   | O(25)#4-La(3)-O(29)#6 | 110.6(2)   |
| O(17)-La(2)-O(10)     | 116.26(19) | O(24)-La(3)-O(29)#6   | 118.8(2)   |
| O(31)#3-La(2)-O(10)   | 71.75(19)  | O(24)#4-La(3)-O(29)#6 | 48.12(19)  |
| O(6)-La(2)-O(10)      | 65.63(18)  | O(29)#5-La(3)-O(29)#6 | 76.6(3)    |
| O(26)#4-La(3)-O(26)   | 63.6(3)    | O(25)-La(3)-O(26)#4   | 68.6(2)    |
| O(25)-La(3)-O(22)#4   | 65.31(18)  | O(25)#4-La(3)-O(26)#4 | 48.33(19)  |
| O(25)#4-La(3)-O(22)#4 | 119.70(18) | O(24)-La(3)-O(26)#4   | 127.4(2)   |
| O(24)-La(3)-O(22)#4   | 108.83(19) | O(24)#4-La(3)-O(26)#4 | 66.0(2)    |
| O(24)#4-La(3)-O(22)#4 | 70.25(18)  | O(29)#5-La(3)-O(26)#4 | 172.56(19) |

|                       |            |                       |            |
|-----------------------|------------|-----------------------|------------|
| O(29)#5-La(3)-O(22)#4 | 110.47(19) | O(29)#6-La(3)-O(26)#4 | 110.0(2)   |
| O(29)#6-La(3)-O(22)#4 | 63.22(19)  | O(25)-La(3)-O(26)     | 48.33(19)  |
| O(26)#4-La(3)-O(22)#4 | 76.18(19)  | O(25)#4-La(3)-O(26)   | 68.6(2)    |
| O(26)-La(3)-O(22)#4   | 110.37(19) | O(24)-La(3)-O(26)     | 66.0(2)    |
| O(25)-La(3)-O(22)     | 119.70(18) | O(24)#4-La(3)-O(26)   | 127.4(2)   |
| O(25)#4-La(3)-O(22)   | 65.31(18)  | O(29)#5-La(3)-O(26)   | 110.0(2)   |
| O(24)-La(3)-O(22)     | 70.25(19)  | O(29)#6-La(3)-O(26)   | 172.56(19) |
| O(24)#4-La(3)-O(22)   | 108.82(19) | O(25)#4-La(3)-O(23)   | 70.3(2)    |
| O(29)#5-La(3)-O(22)   | 63.22(19)  | O(24)-La(3)-O(23)     | 103.7(2)   |
| O(29)#6-La(3)-O(22)   | 110.47(19) | O(24)#4-La(3)-O(23)   | 68.8(2)    |
| O(26)#4-La(3)-O(22)   | 110.37(19) | O(29)#5-La(3)-O(23)   | 65.58(19)  |
| O(26)-La(3)-O(22)     | 76.18(19)  | O(29)#6-La(3)-O(23)   | 65.66(19)  |
| O(22)#4-La(3)-O(22)   | 172.6(3)   | O(26)#4-La(3)-O(23)   | 113.41(19) |
| O(25)-La(3)-O(23)     | 166.73(18) | O(26)-La(3)-O(23)     | 119.77(19) |
| O(29)#5-La(3)-O(23)#4 | 65.66(19)  | O(22)#4-La(3)-O(23)   | 127.88(18) |
| O(29)#6-La(3)-O(23)#4 | 65.57(19)  | O(22)-La(3)-O(23)     | 47.03(17)  |
| O(26)#4-La(3)-O(23)#4 | 119.77(19) | O(25)-La(3)-O(23)#4   | 70.3(2)    |
| O(26)-La(3)-O(23)#4   | 113.41(19) | O(25)#4-La(3)-O(23)#4 | 166.73(18) |
| O(22)#4-La(3)-O(23)#4 | 47.03(17)  | O(24)-La(3)-O(23)#4   | 68.8(2)    |
| O(22)-La(3)-O(23)#4   | 127.88(18) | O(24)#4-La(3)-O(23)#4 | 103.7(2)   |
| O(23)-La(3)-O(23)#4   | 116.5(3)   | O(32)#7-Na(2)-O(9)#8  | 125.4(3)   |
| O(7)-Na(1)-O(4)       | 82.7(3)    | O(32)#7-Na(2)-O(6)    | 91.0(3)    |
| O(7)-Na(1)-O(11)#5    | 94.6(3)    | O(9)#8-Na(2)-O(6)     | 143.3(3)   |
| O(4)-Na(1)-O(11)#5    | 177.1(3)   | O(32)#7-Na(2)-O(4)    | 138.2(3)   |
| O(7)-Na(1)-O(12)#5    | 116.1(3)   | O(9)#8-Na(2)-O(4)     | 92.6(3)    |
| O(4)-Na(1)-O(12)#5    | 129.8(3)   | O(6)-Na(2)-O(4)       | 51.5(2)    |
| O(11)#5-Na(1)-O(12)#5 | 50.5(2)    | O(32)#7-Na(2)-O(8)#8  | 83.7(3)    |
| O(7)-Na(1)-O(3)       | 82.6(2)    | O(9)#8-Na(2)-O(8)#8   | 51.3(2)    |
| O(4)-Na(1)-O(3)       | 85.2(3)    | O(6)-Na(2)-O(8)#8     | 152.6(3)   |
| O(11)#5-Na(1)-O(3)    | 95.6(3)    | O(4)-Na(2)-O(8)#8     | 138.1(3)   |
| O(12)#5-Na(1)-O(3)    | 140.0(3)   | O(32)#7-Na(2)-O(31)   | 124.5(3)   |
| O(7)-Na(1)-O(5)       | 70.5(2)    | O(9)#8-Na(2)-O(31)    | 73.5(2)    |
| O(4)-Na(1)-O(5)       | 48.9(2)    | O(6)-Na(2)-O(31)      | 90.3(3)    |
| O(11)#5-Na(1)-O(5)    | 129.1(3)   | O(4)-Na(2)-O(31)      | 79.0(2)    |
| O(12)#5-Na(1)-O(5)    | 91.8(3)    | O(8)#8-Na(2)-O(31)    | 71.2(2)    |
| O(3)-Na(1)-O(5)       | 128.1(3)   | O(32)#7-Na(2)-O(1)#2  | 86.1(3)    |
| O(7)-Na(1)-O(8)       | 47.5(2)    | O(9)#8-Na(2)-O(1)#2   | 94.1(2)    |
| O(4)-Na(1)-O(8)       | 112.5(3)   | O(6)-Na(2)-O(1)#2     | 83.0(2)    |
| O(11)#5-Na(1)-O(8)    | 64.6(2)    | O(4)-Na(2)-O(1)#2     | 73.1(2)    |
| O(12)#5-Na(1)-O(8)    | 68.6(2)    | O(8)#8-Na(2)-O(1)#2   | 123.2(3)   |
| O(3)-Na(1)-O(8)       | 120.3(2)   | O(31)-Na(2)-O(1)#2    | 148.9(3)   |
| O(5)-Na(1)-O(8)       | 70.5(2)    | O(32)#7-Na(2)-N(3)#8  | 105.8(3)   |
| O(7)-Na(1)-N(4)#5     | 109.4(3)   | O(9)#8-Na(2)-N(3)#8   | 26.2(2)    |

|                       |           |                       |           |
|-----------------------|-----------|-----------------------|-----------|
| O(4)-Na(1)-N(4)#5     | 154.9(3)  | O(6)-Na(2)-N(3)#8     | 157.9(3)  |
| O(11)#5-Na(1)-N(4)#5  | 25.58(19) | O(4)-Na(2)-N(3)#8     | 115.5(3)  |
| O(12)#5-Na(1)-N(4)#5  | 25.19(18) | O(8)#8-Na(2)-N(3)#8   | 25.3(2)   |
| O(3)-Na(1)-N(4)#5     | 117.4(3)  | O(31)-Na(2)-N(3)#8    | 68.4(2)   |
| O(5)-Na(1)-N(4)#5     | 113.2(3)  | O(1)#2-Na(2)-N(3)#8   | 111.9(2)  |
| O(8)-Na(1)-N(4)#5     | 66.9(2)   | O(32)#7-Na(2)-O(16)#8 | 80.6(2)   |
| O(7)-Na(1)-H(4)       | 140.5(7)  | O(9)#8-Na(2)-O(16)#8  | 111.8(2)  |
| O(4)-Na(1)-H(4)       | 87(2)     | O(6)-Na(2)-O(16)#8    | 75.0(2)   |
| O(11)#5-Na(1)-H(4)    | 96(2)     | O(4)-Na(2)-O(16)#8    | 102.7(2)  |
| O(12)#5-Na(1)-H(4)    | 99.7(12)  | O(8)#8-Na(2)-O(16)#8  | 77.5(2)   |
| O(3)-Na(1)-H(4)       | 58.5(8)   | O(31)-Na(2)-O(16)#8   | 46.5(2)   |
| O(5)-Na(1)-H(4)       | 127(2)    | O(1)#2-Na(2)-O(16)#8  | 154.1(2)  |
| O(8)-Na(1)-H(4)       | 160(2)    | N(3)#8-Na(2)-O(16)#8  | 93.2(2)   |
| N(4)#5-Na(1)-H(4)     | 96(2)     | O(32)#7-Na(2)-O(3)#2  | 72.8(2)   |
| O(28)-Na(3)-O(20)     | 144.1(3)  | O(9)#8-Na(2)-O(3)#2   | 69.8(2)   |
| O(19)-Na(3)-O(20)     | 49.3(2)   | O(6)-Na(2)-O(3)#2     | 125.3(2)  |
| O(26)-Na(3)-O(20)     | 84.0(2)   | O(4)-Na(2)-O(3)#2     | 111.3(2)  |
| O(17)#7-Na(3)-O(20)   | 76.0(2)   | O(8)#8-Na(2)-O(3)#2   | 78.8(2)   |
| O(29)-Na(3)-O(20)     | 95.1(2)   | O(31)-Na(2)-O(3)#2    | 142.1(2)  |
| O(30)-Na(3)-O(20)     | 137.1(3)  | O(1)#2-Na(2)-O(3)#2   | 44.97(19) |
| O(28)-Na(3)-O(16)#7   | 77.0(2)   | N(3)#8-Na(2)-O(3)#2   | 74.6(2)   |
| O(19)-Na(3)-O(16)#7   | 75.4(2)   | O(16)#8-Na(2)-O(3)#2  | 146.0(3)  |
| O(26)-Na(3)-O(16)#7   | 148.7(3)  | O(28)-Na(3)-O(19)     | 96.7(3)   |
| O(17)#7-Na(3)-O(16)#7 | 47.6(2)   | O(28)-Na(3)-O(26)     | 81.4(2)   |
| O(29)-Na(3)-O(16)#7   | 117.2(3)  | O(19)-Na(3)-O(26)     | 85.0(3)   |
| O(30)-Na(3)-O(16)#7   | 80.5(2)   | O(28)-Na(3)-O(17)#7   | 120.6(3)  |
| O(20)-Na(3)-O(16)#7   | 100.6(2)  | O(19)-Na(3)-O(17)#7   | 89.1(3)   |
| O(28)-Na(3)-N(9)#7    | 99.6(3)   | O(26)-Na(3)-O(17)#7   | 157.8(2)  |
| O(19)-Na(3)-N(9)#7    | 160.2(3)  | O(28)-Na(3)-O(29)     | 118.2(3)  |
| O(26)-Na(3)-N(9)#7    | 108.4(3)  | O(19)-Na(3)-O(29)     | 144.4(2)  |
| O(17)#7-Na(3)-N(9)#7  | 73.0(2)   | O(26)-Na(3)-O(29)     | 92.9(3)   |
| O(29)-Na(3)-N(9)#7    | 25.58(18) | O(17)#7-Na(3)-O(29)   | 79.5(3)   |
| O(30)-Na(3)-N(9)#7    | 24.65(19) | O(28)-Na(3)-O(30)     | 78.4(3)   |
| O(20)-Na(3)-N(9)#7    | 116.1(3)  | O(19)-Na(3)-O(30)     | 155.8(3)  |
| O(16)#7-Na(3)-N(9)#7  | 97.4(3)   | O(26)-Na(3)-O(30)     | 117.1(3)  |
| O(28)-Na(3)-N(6)#7    | 98.4(3)   | O(17)#7-Na(3)-O(30)   | 73.8(2)   |
| O(19)-Na(3)-N(6)#7    | 82.6(2)   | O(29)-Na(3)-O(30)     | 50.0(2)   |
| O(26)-Na(3)-N(6)#7    | 167.5(3)  | O(21)-N(8)-Na(4)#8    | 62.9(5)   |
| O(17)#7-Na(3)-N(6)#7  | 23.9(2)   | O(23)-N(8)-Na(4)#8    | 60.1(4)   |
| O(29)-Na(3)-N(6)#7    | 98.1(3)   | O(22)-N(8)-Na(4)#8    | 173.3(5)  |
| O(30)-Na(3)-N(6)#7    | 74.9(2)   | O(30)#5-N(9)-O(29)#5  | 122.2(9)  |
| O(20)-Na(3)-N(6)#7    | 89.2(2)   | O(30)#5-N(9)-O(24)    | 120.7(8)  |
| O(16)#7-Na(3)-N(6)#7  | 23.69(19) | O(29)#5-N(9)-O(24)    | 117.1(8)  |

|                        |           |                        |          |
|------------------------|-----------|------------------------|----------|
| N(9)#7-Na(3)-N(6)#7    | 84.0(2)   | O(30)#5-N(9)-Na(3)#5   | 62.8(5)  |
| O(28)-Na(4)-O(24)      | 98.4(3)   | O(29)#5-N(9)-Na(3)#5   | 60.2(5)  |
| O(28)-Na(4)-O(15)      | 81.5(2)   | O(24)-N(9)-Na(3)#5     | 169.6(6) |
| O(24)-Na(4)-O(15)      | 78.4(2)   | O(27)-N(10)-O(25)      | 122.6(8) |
| O(28)-Na(4)-O(20)#9    | 77.4(3)   | O(27)-N(10)-O(26)      | 120.2(9) |
| O(24)-Na(4)-O(20)#9    | 159.9(3)  | O(25)-N(10)-O(26)      | 117.1(8) |
| O(15)-Na(4)-O(20)#9    | 119.7(3)  | O(15)-Na(4)-O(14)      | 47.6(2)  |
| O(28)-Na(4)-O(23)#3    | 148.2(3)  | O(20)#9-Na(4)-O(14)    | 72.1(2)  |
| O(15)-Na(4)-O(23)#3    | 130.2(3)  | O(23)#3-Na(4)-O(14)    | 126.4(2) |
| O(20)#9-Na(4)-O(23)#3  | 82.6(2)   | O(21)#3-Na(4)-O(14)    | 79.6(2)  |
| O(28)-Na(4)-O(21)#3    | 143.0(3)  | O(28)-Na(4)-O(27)#10   | 73.9(3)  |
| O(24)-Na(4)-O(21)#3    | 116.6(3)  | O(24)-Na(4)-O(27)#10   | 84.0(2)  |
| O(15)-Na(4)-O(21)#3    | 93.4(3)   | O(15)-Na(4)-O(27)#10   | 147.2(3) |
| O(20)#9-Na(4)-O(21)#3  | 73.6(2)   | O(20)#9-Na(4)-O(27)#10 | 75.9(2)  |
| O(23)#3-Na(4)-O(21)#3  | 47.8(2)   | O(23)#3-Na(4)-O(27)#10 | 77.4(2)  |
| O(28)-Na(4)-O(14)      | 69.9(3)   | O(21)#3-Na(4)-O(27)#10 | 119.3(2) |
| O(24)-Na(4)-O(14)      | 125.4(2)  | O(14)-Na(4)-O(27)#10   | 135.7(3) |
| O(27)#10-Na(4)-O(30)#5 | 114.2(2)  | O(28)-Na(4)-O(30)#5    | 138.8(2) |
| O(28)-Na(4)-N(8)#3     | 152.7(2)  | O(24)-Na(4)-O(30)#5    | 46.5(2)  |
| O(24)-Na(4)-N(8)#3     | 106.8(3)  | O(15)-Na(4)-O(30)#5    | 71.9(2)  |
| O(15)-Na(4)-N(8)#3     | 113.5(3)  | O(20)#9-Na(4)-O(30)#5  | 143.3(3) |
| O(20)#9-Na(4)-N(8)#3   | 75.4(2)   | O(23)#3-Na(4)-O(30)#5  | 66.8(2)  |
| O(23)#3-Na(4)-N(8)#3   | 24.15(18) | O(21)#3-Na(4)-O(30)#5  | 71.0(2)  |
| O(21)#3-Na(4)-N(8)#3   | 23.71(17) | O(14)-Na(4)-O(30)#5    | 109.8(2) |
| O(14)-Na(4)-N(8)#3     | 102.5(2)  | O(16)-N(6)-O(31)#3     | 121.8(8) |
| O(27)#10-Na(4)-N(8)#3  | 98.0(2)   | O(17)-N(6)-O(31)#3     | 117.2(8) |
| O(30)#5-Na(4)-N(8)#3   | 68.4(2)   | O(16)-N(6)-Na(3)#5     | 67.9(5)  |
| O(3)-N(1)-O(1)         | 122.1(8)  | O(17)-N(6)-Na(3)#5     | 53.3(5)  |
| O(3)-N(1)-O(2)         | 121.1(8)  | O(31)#3-N(6)-Na(3)#5   | 168.7(6) |
| O(1)-N(1)-O(2)         | 116.8(7)  | O(20)-N(7)-O(18)       | 124.3(8) |
| O(4)-N(2)-O(6)         | 121.8(8)  | O(20)-N(7)-O(19)       | 120.7(8) |
| O(4)-N(2)-O(5)         | 120.0(9)  | O(18)-N(7)-O(19)       | 115.0(8) |
| O(6)-N(2)-O(5)         | 118.2(8)  | O(21)-N(8)-O(23)       | 122.6(8) |
| O(8)-N(3)-O(9)         | 121.3(8)  | O(21)-N(8)-O(22)       | 119.7(7) |
| O(8)-N(3)-O(7)         | 121.8(8)  | O(23)-N(8)-O(22)       | 117.8(7) |
| O(9)-N(3)-O(7)         | 116.8(8)  | O(10)-N(4)-Na(1)#7     | 169.1(6) |
| O(8)-N(3)-Na(2)#3      | 63.7(5)   | O(11)-N(4)-Na(1)#7     | 58.2(5)  |
| O(9)-N(3)-Na(2)#3      | 58.2(4)   | O(14)-N(5)-O(13)       | 122.0(8) |
| O(7)-N(3)-Na(2)#3      | 171.7(6)  | O(14)-N(5)-O(15)       | 121.6(8) |
| O(12)-N(4)-O(10)       | 121.9(8)  | O(13)-N(5)-O(15)       | 116.3(7) |
| O(12)-N(4)-O(11)       | 120.2(8)  | O(16)-N(6)-O(17)       | 121.1(9) |
| O(10)-N(4)-O(11)       | 117.9(8)  | H(1)-O(28)-H(2)        | 84(8)    |
| O(12)-N(4)-Na(1)#7     | 63.1(5)   | H(4)-O(32)-H(3)        | 124(10)  |

| Note. Symmetry transformations used to generate equivalent atoms: |                  |                    |
|-------------------------------------------------------------------|------------------|--------------------|
| #1 -x+2,y,-z+1/2                                                  | #2 -x+2,-y,-z+1  | #3 x,-y,z-1/2      |
| #4 -x+1,y,-z+1/2                                                  | #5 x,y-1,z       | #6 -x+1,y-1,-z+1/2 |
| #7 x,y+1,z                                                        | #8 x,-y,z+1/2    | #9 x,-y+1,z-1/2    |
| #10 -x+1,-y+1,-z                                                  | #11 x,-y+1,z+1/2 |                    |

**Table S2.** Atomic coordinates, equivalent isotropic displacement parameters ( $\text{\AA}^2$ ) and bond valence sum (BVS) for  $\text{Na}_4\text{La}_2(\text{NO}_3)_{10}\cdot 2\text{H}_2\text{O}$ .  $U(eq)$  is defined as one third of the trace of the orthogonalized  $U_{ij}$  tensor.

| Atoms | x        | y         | z       | $U(eq)$ | BVS   |
|-------|----------|-----------|---------|---------|-------|
| La(1) | 10000    | 1476(1)   | 2500    | 20(1)   | 3.218 |
| La(2) | 7490(1)  | 1668(1)   | 2551(1) | 19(1)   | 3.203 |
| La(3) | 5000     | 1703(1)   | 2500    | 19(1)   | 3.189 |
| Na(1) | 8911(2)  | -3366(5)  | 3801(3) | 52(1)   | 0.882 |
| Na(2) | 8721(2)  | 1876(5)   | 5352(2) | 35(1)   | 1.038 |
| Na(3) | 6270(2)  | 6593(5)   | 1565(2) | 34(1)   | 1.074 |
| Na(4) | 6200(2)  | 2365(6)   | -261(2) | 38(1)   | 0.906 |
| N(1)  | 9978(4)  | -2533(11) | 5540(5) | 28(2)   | 4.841 |
| N(2)  | 8210(3)  | -206(12)  | 4009(5) | 27(2)   | 4.946 |
| N(3)  | 9212(3)  | -1619(10) | 2099(5) | 24(2)   | 4.869 |
| N(4)  | 8775(4)  | 3497(11)  | 2831(5) | 26(2)   | 4.992 |
| N(5)  | 7449(4)  | 2875(11)  | 656(5)  | 30(2)   | 4.927 |
| N(6)  | 7497(4)  | -1493(12) | 1419(5) | 32(2)   | 4.814 |
| N(7)  | 6814(3)  | 4909(11)  | 3120(5) | 25(2)   | 4.929 |
| N(8)  | 6250(4)  | 433(10)   | 3375(4) | 21(2)   | 4.859 |
| N(9)  | 5715(3)  | -197(11)  | 1076(5) | 28(2)   | 4.961 |
| N(10) | 4967(4)  | 4783(11)  | 1292(5) | 31(2)   | 4.886 |
| O(1)  | 10403(3) | -1592(9)  | 5836(4) | 32(2)   | 1.945 |
| O(2)  | 9572(3)  | -3042(9)  | 6089(4) | 29(2)   | 1.788 |
| O(3)  | 9953(3)  | -2956(10) | 4766(4) | 39(2)   | 1.997 |
| O(4)  | 8539(3)  | -900(9)   | 4563(4) | 31(2)   | 2.075 |
| O(5)  | 8053(3)  | -982(9)   | 3319(4) | 30(2)   | 1.915 |
| O(6)  | 8032(3)  | 1290(9)   | 4097(4) | 27(2)   | 2.071 |
| O(7)  | 9397(3)  | -1291(9)  | 2878(4) | 26(2)   | 2.028 |
| O(8)  | 8931(3)  | -2910(9)  | 1921(4) | 37(2)   | 1.902 |
| O(9)  | 9340(3)  | -547(8)   | 1511(4) | 24(2)   | 2.044 |
| O(10) | 8765(3)  | 2034(8)   | 2542(4) | 25(2)   | 2.12  |
| O(11) | 9299(3)  | 4187(8)   | 2948(4) | 27(2)   | 1.963 |
| O(12) | 8291(3)  | 4279(8)   | 2994(4) | 26(2)   | 1.998 |
| O(13) | 7897(3)  | 3176(9)   | 1179(4) | 33(2)   | 1.911 |
| O(14) | 7452(3)  | 3334(11)  | -104(4) | 49(2)   | 1.558 |

|                     |          |            |          |       |                    |
|---------------------|----------|------------|----------|-------|--------------------|
| O(15)               | 6999(3)  | 2038(9)    | 967(4)   | 32(2) | 1.972              |
| O(16)               | 7484(3)  | -2748(10)  | 948(4)   | 41(2) | 1.793              |
| O(17)               | 7054(3)  | -1166(9)   | 1936(3)  | 25(2) | 2.007              |
| O(18)               | 7032(3)  | 3895(9)    | 3685(4)  | 31(2) | 1.832              |
| O(19)               | 6930(3)  | 4535(9)    | 2322(4)  | 31(2) | 2.008              |
| O(20)               | 6507(3)  | 6132(9)    | 3295(4)  | 33(2) | 2.048              |
| O(21)               | 6745(3)  | 0(9)       | 3716(4)  | 30(2) | 2.038              |
| O(22)               | 6250(3)  | 1483(8)    | 2734(4)  | 25(2) | 1.974              |
| O(23)               | 5735(3)  | -103(9)    | 3631(4)  | 28(2) | 1.95               |
| O(24)               | 5542(3)  | 1310(9)    | 965(4)   | 32(2) | 2.004              |
| O(25)               | 4546(3)  | 3680(9)    | 1296(4)  | 28(2) | 1.91               |
| O(26)               | 5428(3)  | 4560(9)    | 1807(4)  | 33(2) | 1.988              |
| O(27)               | 4927(3)  | 6073(10)   | 852(4)   | 39(2) | 1.798              |
| O <sub>w</sub> (28) | 6271(3)  | 5280(10)   | 186(4)   | 31(2) | 0.421 <sup>a</sup> |
| O(29)               | 5559(3)  | 9093(9)    | 1779(4)  | 26(2) | 2.017              |
| O(30)               | 6028(3)  | 9098(10)   | 528(4)   | 35(2) | 1.798              |
| O(31)               | 7944(3)  | 441(9)     | 6393(4)  | 28(2) | 1.942              |
| O <sub>w</sub> (32) | 8720(3)  | -5158(10)  | 5006(5)  | 37(2) | 0.411 <sup>a</sup> |
| H(1)                | 6040(30) | 5860(110)  | -140(50) | 37    | 1.132              |
| H(2)                | 6550(30) | 5660(120)  | -120(50) | 37    | 1.087              |
| H(3)                | 9030(30) | -4620(120) | 5180(60) | 45    | 1.114              |
| H(4)                | 8400(30) | -5310(130) | 5310(50) | 45    | 1.145              |

a. The H-O bonds have not been included in the bond valence calculations.

**Table S3.** The birefringence@1064 nm of KLN calculated by different exchange-correlation functional and pseudopotential.

| Functional | Pseudopotential | birefringence@1064nm |
|------------|-----------------|----------------------|
| GGA        | NCP             | 0.115                |
| GGA        | USP             | 0.119                |
| LDA        | NCP             | 0.134                |
| LDA        | USP             | 0.125                |

**Table S4.** The calculated birefringence@1064 nm and SHG tensors of KYN and KSN.

| Crystal | SHG coefficients                            | birefringence@1064nm |
|---------|---------------------------------------------|----------------------|
| KYN     | $d_{31}=2.02$ $d_{32}=-2.04$ $d_{33}=-0.11$ | 0.128                |
| KSN     | $d_{31}=1.76$ $d_{32}=-2.49$ $d_{33}=0.28$  | 0.136                |
